# Supplementary material for: Prevalence and Antimicrobial Susceptibility Patterns of Bacteria from Milkmen and Cows with Clinical Mastitis in and around Kampala, Uganda
Source: PLoS One. 2013 May 7;8(5):e63413. doi: 10.1371/journal.pone.0063413 (PMC3646745; doi:10.1371/journal.pone.0063413)
Supplement: Table S1 — Isolate profiles (bovine and human samples). R, resistant; S, susceptible, with respect to: Staphylococci: Ampicillin; Penicillin G; Trimethopprim-sulfamethoxazole; Tetracycline; Cefoxitine; Oxacillin; Amoxicillin-Clavulanate; Teicoplanin; Vancomycin; Clindamycin; Erythromycin; Nitrofurantoin; Rifampicin Enterococci: Daptomycin; Teicoplanin; Vancomycin; Erythromycin; Ciprofloxacin; Tetracycline. Gram-negatives: Ampicillin; Amoxicillin-Clavulanate; Trimethopprim-sulfamethoxazole; Colistin; Imipenem; Cefoxitine; Cefotaxim; Cephalothin; Cefuroxime; Cefepime; Aztreonam; Erythromycin; Nitrofurantoin; Piperacillin-Tazobactum; Ertapenem NA: Not applicable DRE: Daptomycin resistant enterococcus VRE: Vancomycin resistant enterococcus MSSA: Methicillin susceptible Staphylococcus aureus MRS: Methicillin resistant Staphylococcus MR-VRS: Methicillin-resistant, vancomycin-resistant Staphylococcus DST: Drug susceptibility testing *Zero grazing is an approach to animal management in which families contain livestock in an enclosed, shaded area and carry fodder and water to them instead of letting them wander in the open where they are more likely to catch diseases or damage the environment [http://www.heifer.org.za/faq/what_is_zero_grazing]. (XLS) [file pone.0063413.s001.xls]

## Sheet: Bovine samples
Prevalence and Antimicrobial Sensitivity Patterns of Bacteria from Milkmen and Cows with Clinical Mastitis in and around Kampala, Uganda
Bovine samples (milk)
	Date	Farm system*	Sample ID	Breed	Body temperature (⁰C)	Bacterial species	DST profiles	Remarks
1	2010-02-23	Dairy farm (A1)	ky9c1	Friesian	38.4	Staphylococcus aureus	RRSSSSSSSSSSSS	MSSA
2	2010-03-22	Dairy farm (A1)	ky84c	Friesian	38.5	Staphylococcus intermedius	RRSSRRRSSSSSSS	MRS
3	2010-12-18	Dairy farm (A1)	ky3c	Friesian	38.6	Staphylococcus epidermidis	RRRRSSSSSSSSSS
4	2010-11-07	Dairy farm (A1)	ky32c	Cross-breed	38.5	Staphylococcus haemolyticus	RRSSSSSSSSSSSS
5	2010-10-28	Dairy farm (A2)	ky13c	Friesian	38.3	Staphylococcus hominis	RRSSRRRRSSSRRS	MR-VRS
6	2010-09-08	Dairy farm (A2)	ky17c	Friesian	38.7	Staphylococcus xylosus	RRRSSSSSSSSSSS
7	2010-08-12	Dairy farm (A2)	ky119c	Jersey	38.6	Staphylococcus xylosus	RRSRSSSSSSSSSS
8	2010-07-13	Dairy farm (A3)	ky2c	Friesian	38.3	Staphylococcus xylosus	RRRRRRSSSRRSSS	MRS
9	2010-06-05	Dairy farm (A3)	ky12c	Friesian	38.7	Staphylococcus lugdunensis	RRSRRRRRRSSRRS	MR-VRS
10	2010-05-01	Dairy farm (A3)	ky21c	Cross-breed	38.9	Staphylococcus sciuri	RRSSRRSSSRSSSS	MRS
11	2010-04-03	Dairy farm (A3)	ky100c	Friesian	38.5	Staphylococcus sciuri	RRSSSSSSSSSSSS
12	2010-04-23	Dairy farm (A3)	ky18c	Friesian	38.9	Staphylococcus gallinarum	RRSRRRRSSRSSSS	MRS
13	2011-02-02	Dairy farm (A3)	ky4cb	Friesian	38.4	Staphylococcus saprophyticus	RRRSSSSSSSSSSS
14	2011-03-03	Dairy farm (A3)	ky7c	Friesian	38.5	Staphylococcus saprophyticus	RRRRRRSSSSRSSS	MRS
15	2010-04-01	Dairy farm (A4)	ky72cb2	Friesian	38.4	Staphylcoccus saprophyticus	RRSSRRRSSSSSSS	MRS
16	2010-05-03	Dairy farm (A4)	ky5cb2	Cross-breed	38.2	Staphylcoccus saprophyticus	RRSSRRRSSSSSSS	MRS
17	2010-06-10	Dairy farm (A4)	ky4cb1	Friesian	38.6	Staphylococcus hyicus	RRRRSSSSSSSSSS
18	2010-06-09	Dairy farm (A4)	ky123c	Friesian	38.5	Staphylococcus hyicus	RRSSRRRSSSSSSS	MRS
19	2010-07-07	Dairy farm (A4)	ky414c	Friesian	39	Staphylococcus hyicus	RRSSRRRSSSSSSS	MRS
20	2010-08-20	Dairy farm (A4)	ky118c	Friesian	38.5	Staphylococcus hyicus	RRSSRRRSSSSSSS	MRS
21	2010-09-29	Dairy farm (A5)	ky102c	Friesian	38.8	Staphylococcus pasteuri	RRSRSSSSSSSSSS
22	2010-10-30	Dairy farm (A6)	ky106c	Friesian	38.5	Enterococcus faecalis	SSSRRR
23	2010-03-25	Dairy farm (A6)	ky22c	Cross-breed	38.6	Enterococcus faecalis	SSSRSR
24	2010-11-13	Dairy farm (A6)	ky43c	Friesian	38.7	Enterococcus faecalis	SRRSSS	VRE
25	2010-12-14	Dairy farm (A7)	ky4ca	Friesian	38.5	Enterococcus faecium	SSSRSS
26	2010-05-24	Dairy farm (A7)	ky24c1	Friesian	38.5	Enterococcus faecium	RSSRSS	DRE
27	2010-09-19	Dairy farm (A8)	ky7cb-2	Friesian	38.4	Enterococcus faecium	SSSSSS
28	2010-07-21	Dairy farm (A8)	ky7ca	Friesian	38.5	Enterococcus faecium	SSSSSS
29	2010-11-17	Dairy farm (A8)	ky8c1	Cross-breed	38.5	Enterococcus faecium	SSSRSS
30	2010-12-10	Dairy farm (A9)	ky23c	Friesian	38.2	Enterococcus hirae	SSSRSR
31	2010-11-12	Dairy farm (A9)	ky20c	Friesian	38.5	Enterococcus hirae	SSSSSS
32	2010-10-11	Dairy farm (A9)	ky7ca2	Friesian	38.8	Enterococcus hirae	SSSSSR
33	2010-09-14	Dairy farm (A9)	ky33c1	Cross-breed	38.6	Enterococcus hirae	SSSRSS
34	2010-08-15	Dairy farm (A9)	ky45c	Friesian	38.5	Enterococcus durans	SSSSSR
35	2010-07-13	Dairy farm (A9)	ky15c	Friesian	38.9	Enterococcus raffinosus	SSSRSR
36	2010-06-20	Dairy farm (A10)	ky40c1	Guernsey	38.5	Enterococcus casseliflavus/gallinarum	SRRSSS	VRE
37	2010-05-30	Dairy farm (A11)	ky104c	Cross-breed	38	Enterococcus casseliflavus/gallinarum	SRRRSR	VRE
38	2010-04-29	Dairy farm (A11)	ky12c	Guernsey	38.5	Arcanobacterium pyogenes	NA
39	2010-03-27	Dairy farm (A11)	ky16c	Guernsey	38.1	Lactococcus garvieae	NA
40	2010-02-23	Dairy farm (A12)	ky100c	Guernsey	38.7	Lactococcus lactis ssp lactis	NA
41	2010-12-20	Dairy farm (A12)	ky117cb3	Cross-breed	38.5	Lactococcus lactis ssp lactis	NA
42	2010-11-23	Dairy farm (A12)	ky1c1	Guernsey	38.5	Lactococcus lactis ssp lactis	NA
43	2010-10-03	Dairy farm (A13)	ky1c1	Guernsey	38.2	Lactococcus lactis ssp lactis	NA
44	2010-09-14	Dairy farm (A14)	ky18a	Cross-breed	38.5	Micrococcus lylae	NA
45	2010-08-30	Dairy farm (A14)	ky4cb1	Guernsey	38.5	Micrococcus lylae	NA
46	2010-07-31	Dairy farm (A14)	ky93c	Guernsey	38.3	Streptococcus acidominimus	NA
47	2010-06-12	Dairy farm (A14)	ky9c2	Jersey	38	Streptococcus acidominimus	NA
48	2010-05-13	Dairy farm (A14)	ky39c	Jersey	38.5	Streptococcus acidominimus	NA
49	2010-04-02	Dairy farm (A15)	ky18c	Jersey	38	Streptococcus angionosus	NA
50	2010-03-03	Dairy farm (A16)	ky95ca2	Jersey	38.3	Streptococcus bovis II (Strep. Group D)	NA
51	2010-07-03	Zero-grazing (B1)	ky107c	Friesian	38.5	Streptococcus bovis II (Strep. Group D)	NA
52	2010-12-10	Zero-grazing (B1)	ky26c1	Cross-breed	38.5	Streptococcus bovis II (Strep. Group D)	NA
53	2011-01-10	Zero-grazing (B1)	ky101c	Friesian	38.5	Streptococcus bovis II (Strep. Group D)	NA
54	2010-08-03	Zero-grazing (B2)	ky102c	Cross-breed	38	Streptococcus bovis II (Strep. Group D)	NA
55	2010-12-10	Zero-grazing (B2)	ky42cs1	Friesian	38.4	Streptococcus uberis	NA
56	2011-01-11	Zero-grazing (B3)	ky100c	Cross-breed	38.6	Streptococcus uberis	NA
57	2010-09-03	Zero-grazing (B4)	ky46c	Cross-breed	38.1	Streptococcus uberis	NA
58	2010-01-10	Zero-grazing (B4)	ky44cs1	Friesian	38.5	Streptococcus group C/G (large colony)	NA
59	2011-03-18	Zero-grazing (B4)	Ky999c	Cross-breed	39	Citrobacter freundii	RRSSSRSRRSSSSSS
60	2010-09-08	Zero-grazing (B4)	ky9c	Cross-breed	39.5	Escherichia coli	SSSSSSSRSSSSSSS
61	2011-03-09	Zero-grazing (B4)	ky103c1	Friesian	40	Escherichia coli	SSSSSSSRSSSSSSS
62	2010-03-04	Zero-grazing (B4)	ky191c-1	Cross-breed	38.5	Escherichia coli	SSSSSSSRSSSSSSS
63	2010-11-07	Zero-grazing (B5)	ky19c1	Cross-breed	38.9	Escherichia coli	RRRSSSSRSSSSSSS
64	2011-01-15	Zero-grazing (B5)	ky103c2	Cross-breed	38.5	Escherichia coli	SSSSSSSSSSSSSSS	Fully susceptible
65	2010-08-14	Zero-grazing (B6)	ky34c	Friesian	40	Escherichia coli	RSSSSSSRSSSSSSS
66	2011-03-25	Zero-grazing (B6)	ky35c	Cross-breed	38.5	Escherichia coli	RSRSSSSRSSSSSSS
67	2011-03-09	Zero-grazing (B7)	ky37c	Friesian	38.8	Escherichia coli	RSRSSSSRSSSSSSS
68	2011-03-18	Zero-grazing (B8)	ky1c1	Cross-breed	38.5	Escherichia coli	RSRSSSSSSSSSSSS
69	2011-02-08	Zero-grazing (B8)	ky107c	Cross-breed	38.7	Escherichia coli	SSSSSSSRSSSSSSS
70	2011-01-05	Zero-grazing (B8)	ky27c	Friesian	38.5	Escherichia coli	RRSSSSSRSSSSSSS
71	2011-03-24	Zero-grazing (B9)	ky25c	Cross-breed	38.9	Escherichia coli	RSSSSSSSSSSSSSS
72	2011-01-04	Zero-grazing (B9)	ky19a	Cross-breed	38.5	Klebsiella oxytoca	RSRSSSSSSSSSSSS
73	2011-03-02	Zero-grazing (B10)	ky18a	Friesian	39.9	Klebsiella oxytoca	RSSSSSSSSSSSSSS
74	2011-03-30	Zero-grazing (B11)	ky9c	Cross-breed	38.5	Klebsiella oxytoca	RRSSSRRRSRRSSRS
75	2011-01-04	Zero-grazing (B11)	ky7bc1	Cross-breed	41	Klebsiella oxytoca	RSRSSSSSSSSSSSS
76	2011-01-02	Zero-grazing (B11)	ky223ca1	Cross-breed	38.6	Klebsiella oxytoca	RSRSSRSRRRRSSRS
77	2011-03-01	Zero-grazing (B12)	ky102c	Cross-breed	38	Leclercia adecarboxylata	SSSSSSSSSSSSSSS	Fully susceptible
78	2011-02-04	Zero-grazing (B12)	ky114c	Cross-breed	38.5	Proteus vulgaris	RSRRSSSRRSSSRSS
79	2011-03-10	Zero-grazing (B13)	ky1c2	Cross-breed	38.9	Proteus vulgaris	RSSSSSSSSSSSSRS
80	2011-03-04	Zero-grazing (B14)	ky29c	Cross-breed	38.7	Serratia marcescens	RRSRSSSRRSSSRSS
81	2010-12-20	Zero-grazing (B14)	ky30c	Cross-breed	38.7	Serratia marcescens	RRSRSRSRRSSSRSS
82	2010-07-04	Zero-grazing (B15)	ky22c1	Cross-breed	38.8	Cedecea davisae	RRSRSRRRRSSSRSR
83	2010-06-13	Zero-grazing (B16)	ky373c1	Cross-breed	38.6	Candida albicans	NA
84	2010-05-04	Zero-grazing (B17)	ky135c1	Indigenous	38.5	No growth	NA
85	2010-03-15	Zero-grazing (B17)	ky36c	Cross-breed	38.4	No growth	NA
86	2011-02-25	Communal grazing (C)	ky49c	Cross-breed	38.5	No growth	NA
87	30-Feb-2010	Communal grazing (C)	ky51c	Indigenous	38	No growth	NA
88	2010-05-23	Communal grazing (C)	ky64c	Cross-breed	38.1	No growth	NA
89	2011-02-28	Communal grazing (C)	ky78c	Cross-breed	38.5	No growth	NA
90	2010-03-23	Communal grazing (C)	ky72c	Indigenous	38.9	No growth	NA
91	2010-10-23	Communal grazing (C)	ky63c	Cross-breed	38.5	No growth	NA
92	2010-02-23	Communal grazing (C)	ky73c	Cross-breed	38	No growth	NA
93	2011-02-10	Communal grazing (C)	ky69c	Indigenous	38.8	No growth	NA
94	2010-04-23	Communal grazing (C)	ky91c	Cross-breed	38	No growth	NA
95	2010-02-23	Communal grazing (C)	ky81c	Indigenous	38.5	contaminated	NA
96	2010-11-23	Communal grazing (C)	ky22c	Cross-breed	39	contaminated	NA
97	2011-02-01	Communal grazing (C)	ky14c	Cross-breed	38.5	contaminated	NA

## Sheet: Human samples
Prevalence and Antimicrobial Sensitivity Patterns of Bacteria from Milkmen and Cows with Clinical Mastitis in and around Kampala, Uganda
Human samples (nares)
	Sample ID	Farm system	Date	Species	DST profiles	Remarks
1	ky17n	Dairy farm (A1)	2010-02-23	Staphylococcus aureus	RRRRSSSSSSSSS	MSSA
2	ky32h1	Dairy farm (A1)	2010-12-18	Staphylococcus intermedius	RRRRRRRSSRRSSS	MRS
3	ky5h	Dairy farm (A3)	2010-05-01	Staphylococcus sciuri	RRSSRRRRRRRRSR	MR-VRS
4	ky7h1	Dairy farm (A3)	2010-04-03	Staphylococcus sciuri	RRSSRRRRRRRRSR	MR-VRS
5	ky18h1	Dairy farm (A3)	2010-04-03	Staphylococcus sciuri	RRSSRRRRRRRRSR	MR-VRS
6	kynh2	Dairy farm (A3)	2011-02-02	Staphylococcus saprophyticus	RRRRRRRSSSSSSS	MRS
7	muz7h1	Dairy farm (A3)	2011-03-03	Staphylococcus saprophyticus	RRSSRRRSSSSSSS	MRS
8	ky23n1	Dairy farm (A2)	2010-07-13	Staphylococcus xylosus	RRRRRRSSSRRSSS	MRS
9	ky6n1	Zero-grazing (B1)	2010-07-03	Staphylococcus aureus	RRRRSSSSSSSSS	MSSA
10	ky2n1	Zero-grazing (B1)	2010-12-10	Staphylococcus aureus	RRRRSSSSSSSSS	MSSA
11	ky27n	Zero-grazing (B1)	2011-03-04	Staphylococcus aureus	RRRRSSSSSSSSS	MSSA
12	ky3h1	Dairy farm (A9)	2010-12-10	Enterococcus hirae	SSSRSR
13	ky7n1	Dairy farm (A9)	2010-11-12	Enterococcus hirae	SSSSSR
14	ky5h1	Dairy farm (A6)	2010-10-30	Enterococcus faecalis	SSSRSR
15	ky43n1	Dairy farm (A6)	2010-03-25	Enterococcus faecalis	SSSRRR
16	muz7n1	Dairy farm (A7)	2010-12-14	Enterococcus faecium	SSSSSR
17	ky4h1	Dairy farm (A7)	2010-05-24	Enterococcus faecium	SSSSSS
18	ky7h1	Dairy farm (A7)	2010-09-19	Enterococcus faecium	SSSRSS
19	ky5n2	Dairy farm (A7)	2010-12-14	Enterococcus faecium	SSSSSS
20	ky5n1	Dairy farm (A12)	2010-12-20	Lactococcus lactis ssp lactis	NA
21	ky18n1	Zero-grazing (B4)	2010-01-10	Streptococcus pneumoniae	NA
22	ky19n	Zero-grazing (B4)	2011-03-18	Streptococcus pneumoniae	NA
23	ky5na1	Zero-grazing (B1)	2010-07-03	Streptococcus bovis II (Strep. group D)	NA
24	ky9h1	Zero-grazing (B1)	2010-12-10	Streptococcus bovis II (Strep. group D)	NA
25	ky14h1	Dairy farm (A3)	2010-06-05	No growth	NA
26	kyn53n	Dairy farm (A14)	2010-06-12	No growth	NA
27	muz7h1	Dairy farm (A12)	2010-03-27	No growth	NA
28	ky16n1	Dairy farm (A8)	2010-09-19	No growth	NA
29	ky22h1	Dairy farm (A10)	2010-06-20	No growth	NA
30	ky42h1	Dairy farm (A5)	2010-09-29	No growth	NA
31	ky33h1	Dairy farm (A14)	2010-08-30	No growth	NA
